# Supplementary material for: Calponin 3 suppresses proliferation, migration and invasion of non-small cell lung cancer cells
Source: PubMed Central journal article supplement — Oncol Lett. 2021 Jul 1;22(2):634. doi: 10.3892/ol.2021.12895 (PMC8258620; doi:10.3892/ol.2021.12895), 2021-07-01
Supplement: Supplementary_Data.pdf [file Supplementary_Data.pdf]

Figure S1. Roles of CNN3 in the diagnosis and prognosis of NSCLC. (A) Role of CNN3 in the diagnosis of NSCLC as analyzed using the GSE2514 and GSE10072 datasets from the GEO database and the LUAD and LUSC data from TCGA and the GTEx database. (B) Role of CNN3 in the prognosis of NSCLC as analyzed using data from the GSE72094, GSE41271 and GSE31210 datasets from the GEO database. AUC, area under the curve; CNN3, calponin 3; GEO, Gene Expression Omnibus; GTEx, Genotype Tissue Expression; LUAD, lung adenocarcinoma; LUSC, lung squamous cell carcinoma; NSCLC, non-small cell lung cancer; AUC, area under the curve; TCGA, The Cancer Genome Atlas.

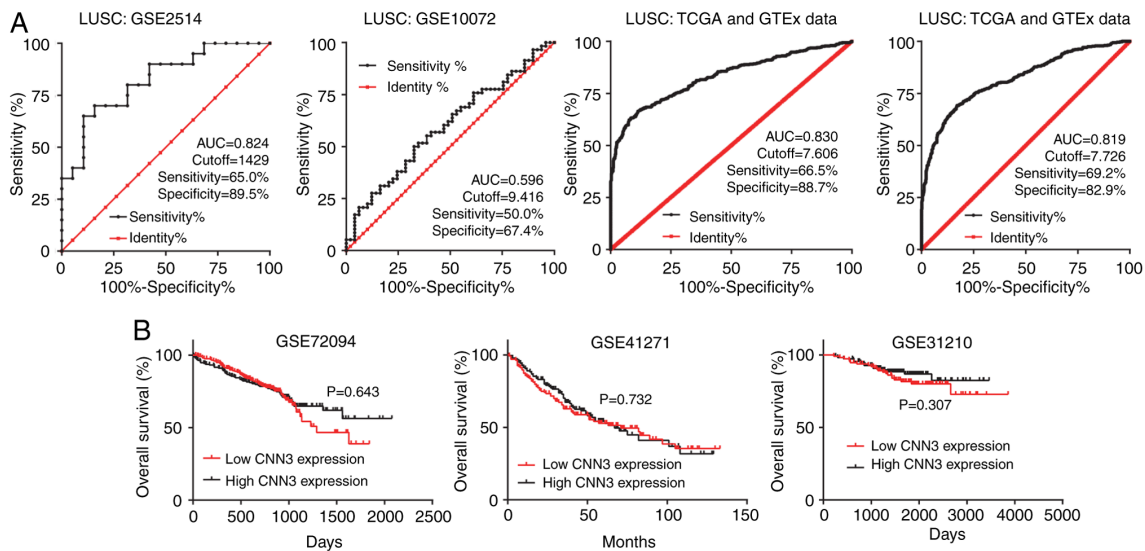

Figure S2. CNN3 mRNA expression in the NCI-H1975, PC9 and NCI-H520 non-small cell lung cancer cell lines was significantly lower than that in the BEAS-2B normal epithelial cells. CNN3 mRNA expression was measured by reverse transcription-quantitative PCR. \*\*\*P<0.001. CNN3, calponin 3.

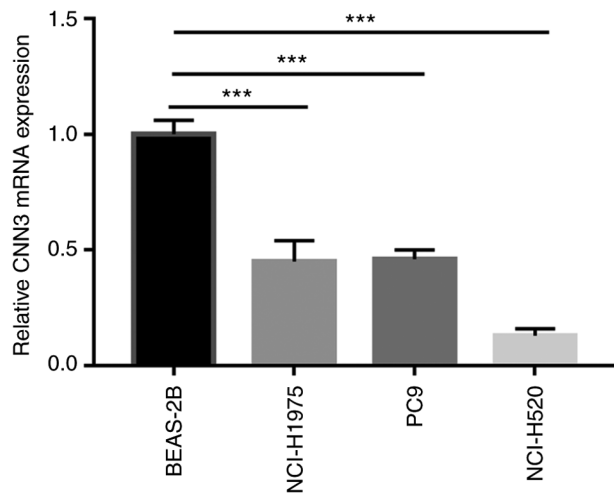

Figure S3. CNN3 overexpression inhibits the proliferation of NCI-H1975 and NCI-H520 cells. CNN3 mRNA and protein expression in the cells was measured by (A) reverse transcription-quantitative PCR and (B) western blotting, respectively. Effects of CNN3 overexpression on (C) NCI-H1975 and (D) NCI-H520 cell proliferation were measured using an MTS assay. \* $P < 0.05$ , \*\* $P < 0.01$  and \*\*\* $P < 0.001$ . CNN3, calponin 3; NC, empty vector pcDNA 3.1; OD, optical density.

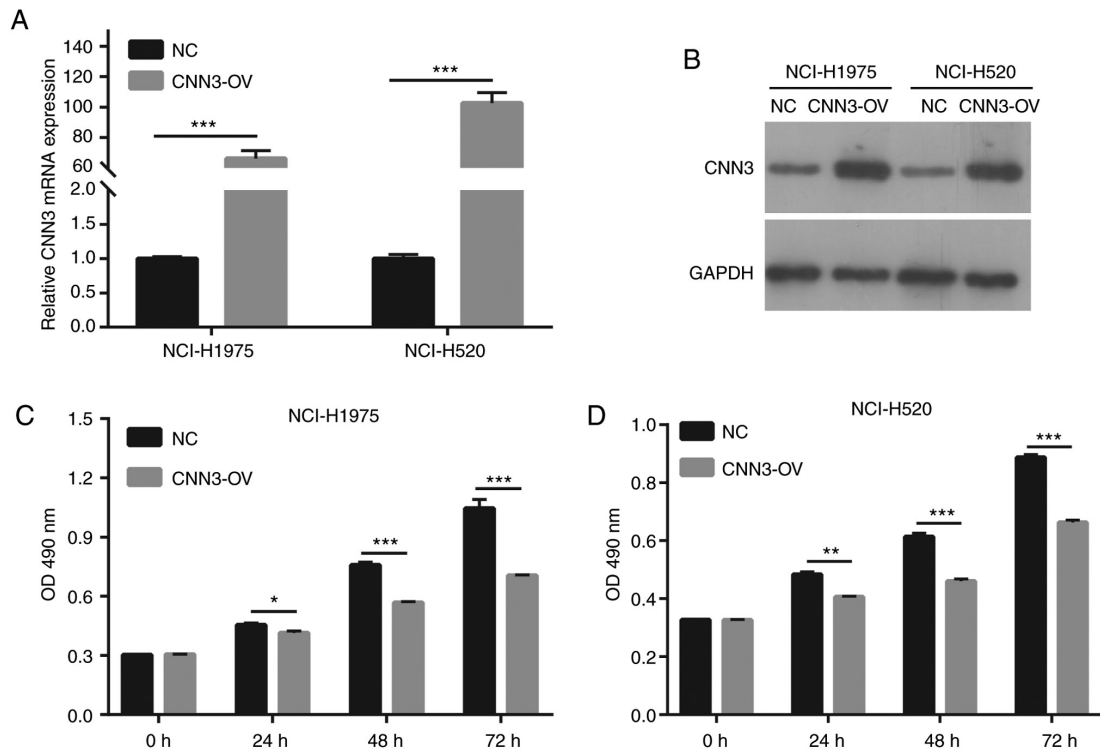

Table SI. Basic clinical information of all the patients in the GSE2514 and GSE10072 datasets.

| Variable group               | Dataset         |                          |               |                          |
|------------------------------|-----------------|--------------------------|---------------|--------------------------|
|                              | GSE2514         |                          | GSE10072      |                          |
|                              | Adjacent tissue | Cancer tissue            | Normal tissue | Cancer tissue            |
| Disease                      |                 | Pulmonary adenocarcinoma |               | Pulmonary adenocarcinoma |
| Number                       | 19              | 20                       | 58            | 49                       |
| Mean age at diagnosis, years | No record       | No record                | 66.4±7.9      | 65.6±7.7                 |
| Sex, n                       |                 |                          |               |                          |
| Male                         | No record       | No record                | 35            | 34                       |
| Female                       | No record       | No record                | 23            | 15                       |
| Tobacco history, n           | No record       | No record                | 42            | 34                       |
| Stage, n                     |                 |                          |               |                          |
| I+II                         | No record       | No record                | 43            | 37                       |
| III+IV                       | No record       | No record                | 15            | 12                       |

Table SII. Basic clinical information of all the patients in the GSE72094, GSE41271 and GSE31210 datasets.

| Variable                    | Dataset             |                  |                     |
|-----------------------------|---------------------|------------------|---------------------|
|                             | GSE72094            | GSE41271         | GSE31210            |
| Disease                     | Lung adenocarcinoma | NSCLC            | Lung adenocarcinoma |
| Number                      | 398                 | 275              | 226                 |
| Mean age at diagnosis years | 69.3±9.5            |                  | 59.6±7.4            |
| Sex, n                      |                     |                  |                     |
| Male                        | 176                 | 148              | 105                 |
| Female                      | 222                 | 127              | 121                 |
| Tobacco history, n          | 300                 | 247              | 111                 |
| Stage, n                    |                     |                  |                     |
| I+II                        | 321                 | 183              | 226                 |
| III+IV                      | 72                  | 92               | 0                   |
| Survival status, n          |                     |                  |                     |
| Alive                       | 285                 | 151              | 191                 |
| Dead                        | 113                 | 124              | 35                  |
| Survival time               | 791.9±402.7 days    | 44.0±31.3 months | 1722.9±689.4 days   |

NSCLC, non-small cell lung cancer.
